# Supplementary material for: Synthesis of well-defined PCL-b-PnBA-b-PMMA ABC-type triblock copolymers: toward the construction of nanostructures in epoxy thermosets
Source: Royal Society of Chemistry journal article supplement (doi:10.1039/c8py01357h), 2018-01-01
Supplement: c8py01357h1.pdf [file c8py01357h1.pdf]

Electronic Supplementary Information

**Synthesis of Well-defined PCL-*b*-PnBA-*b*-PMMA ABC-Type  
Triblock Copolymers: Toward the Construction of  
Nanostructures in Epoxy Thermosets**

*Chih-Feng Huang,\* Wen-Hua Chen, Junko Aimi, Yi-Shen Huang, Venkatesan Sathesh, Yeo-Wan*

*Chiang, Shih-Hung Huang, Shiao-Wei Kuo and Tao Chen*

**Captions of ESI**

Scheme S1. General reaction mechanisms of (A) typical ATRP and (B) HE ATRP.

Figure S1. <sup>1</sup>H NMR spectrum (400 MHz, CDCl<sub>3</sub>) of PCL-Br obtained through ROP of ε-CL (ε-CL/HEBiB/DPP = 200/1/1 at 40 °C; [ε-CL]<sub>0</sub> = 9.0 M).

Figure S2. FT-IR spectra of the obtained (a) PCL, (b) PCL-*b*-PnBA, and (c) PCL-*b*-PnBA-*b*-PMMA (block co)polymers, displaying the range 4000–400 cm<sup>-1</sup>.

Figure S3. TGA traces of ET/tBCP composites at various weight ratios.

Figure S4. Apparent images of ET/tBCP composites at various weight ratios.

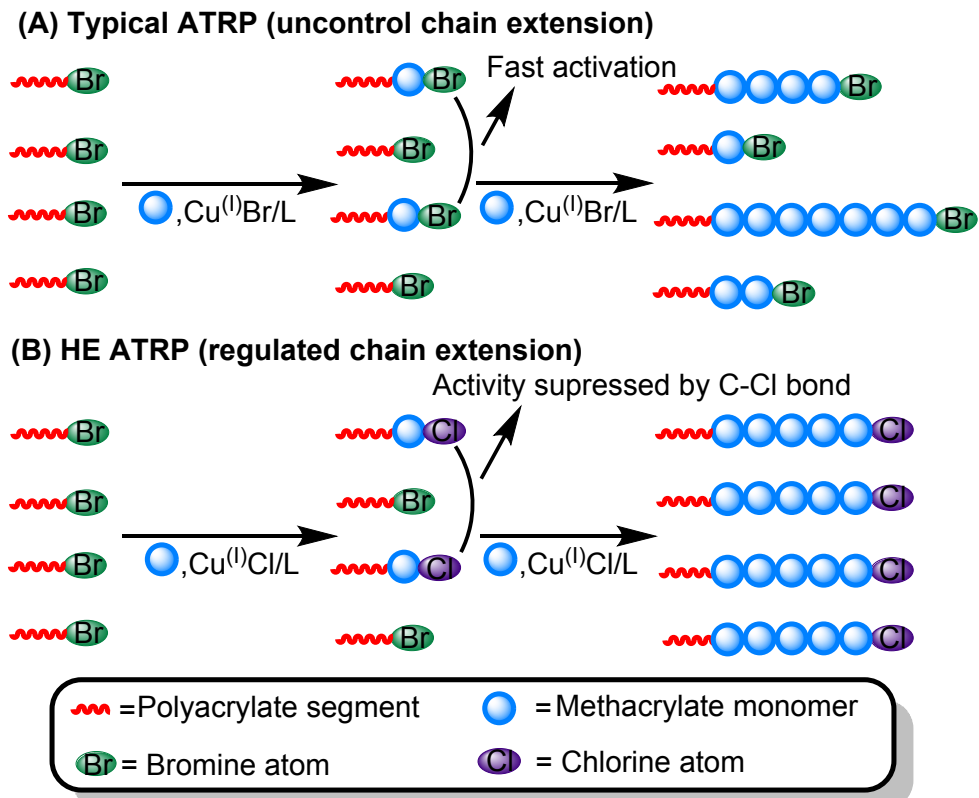

**Scheme S1.** General reaction mechanisms of (A) typical ATRP and (B) HE ATRP.

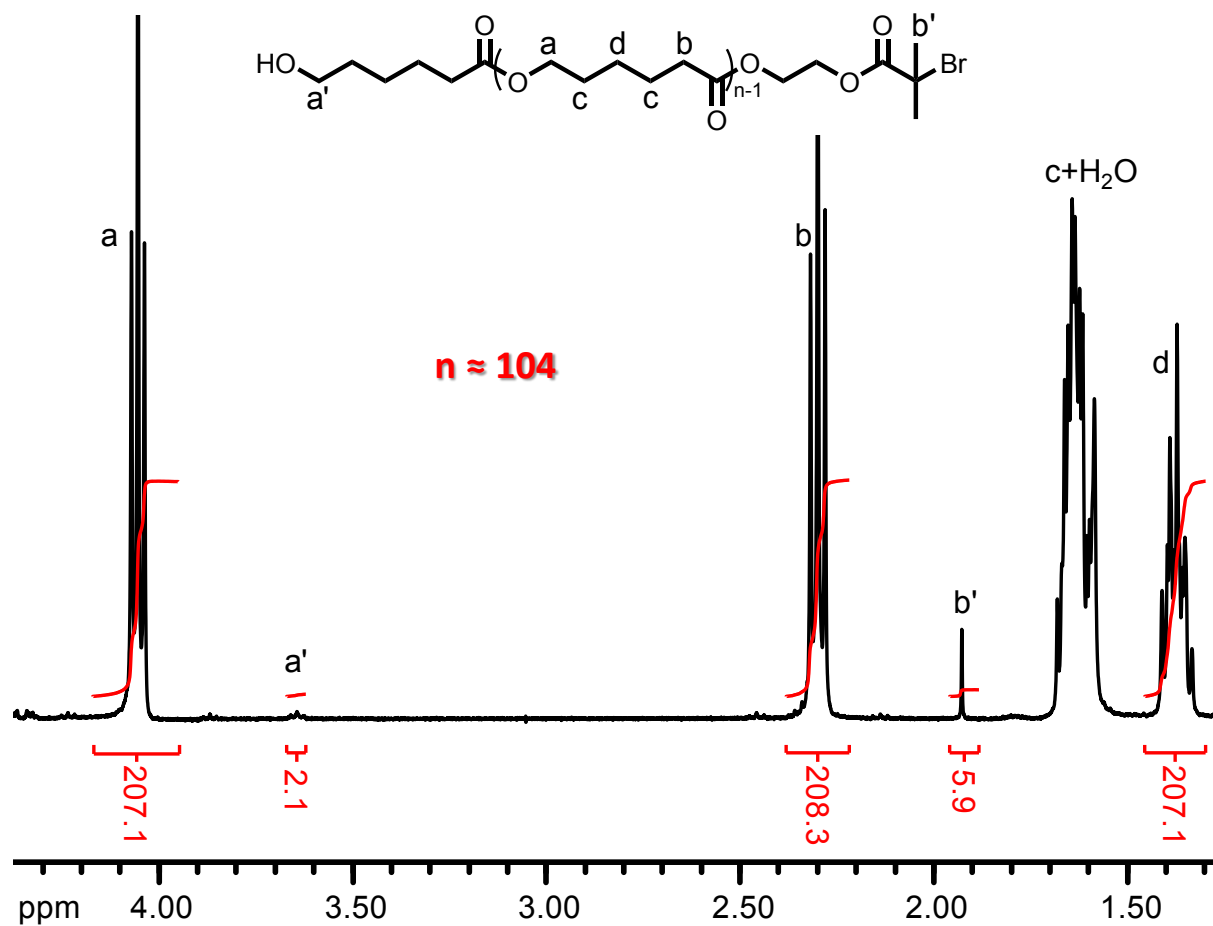

**Figure S1.**  $^1\text{H}$  NMR spectrum (400 MHz,  $\text{CDCl}_3$ ) of PCL-Br obtained through ROP of  $\epsilon$ -CL ( $\epsilon$ -CL/HEBiB/DPP = 200/1/1 at 40 °C;  $[\epsilon\text{-CL}]_0 = 9.0$  M).

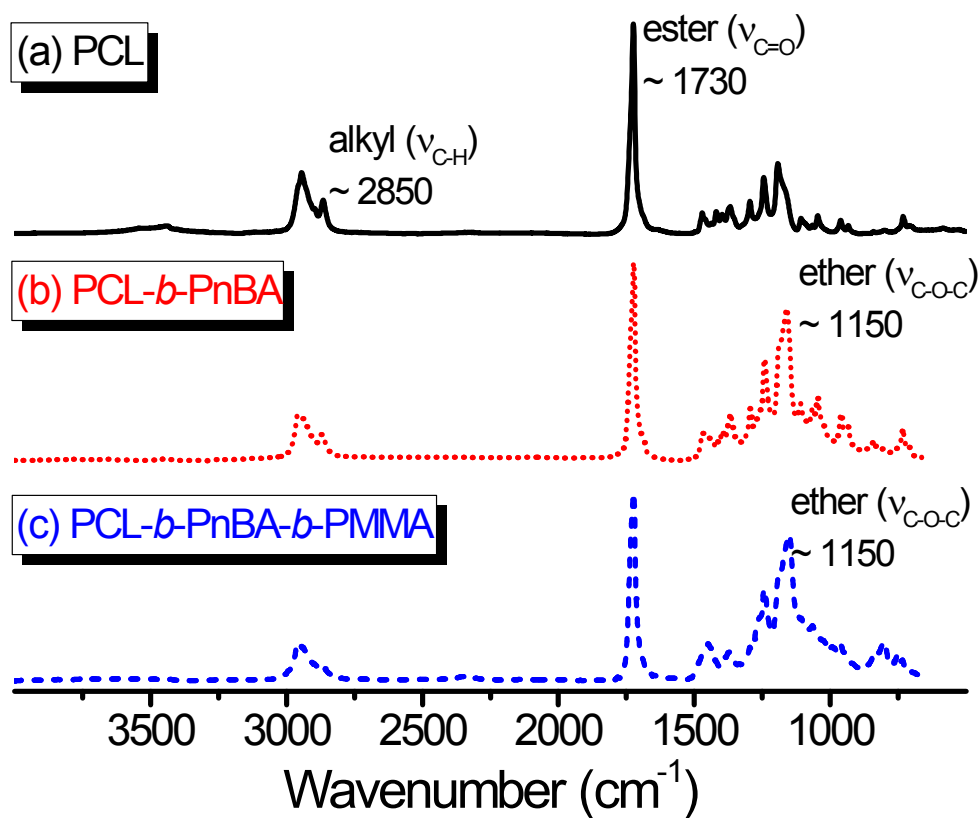

**Figure S2.** FT-IR spectra of the obtained (a) PCL, (b) PCL-*b*-PnBA, and (c) PCL-*b*-PnBA-*b*-PMMA (block co)polymers, displaying the range 4000–400 cm<sup>-1</sup>.

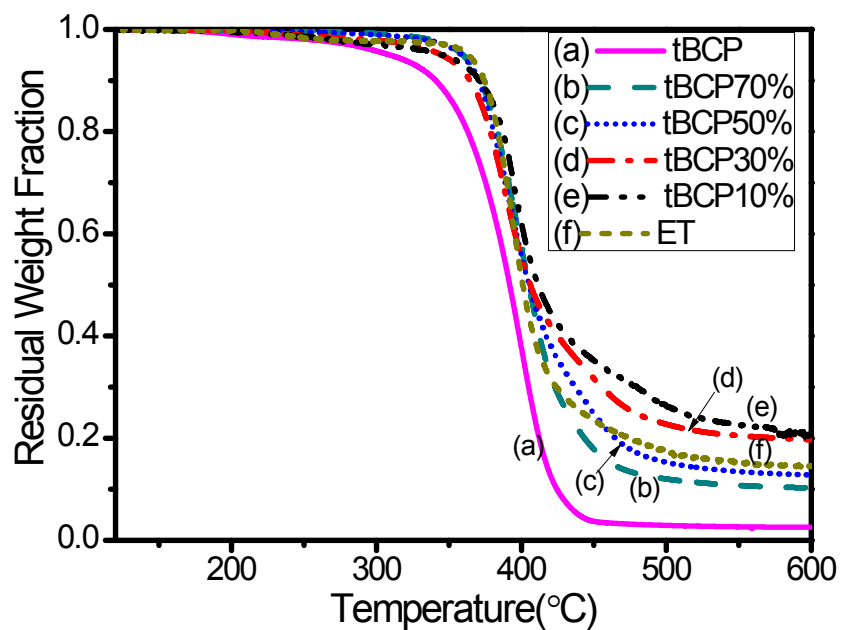

Figure S3. TGA traces of ET/tBCP composites at various weight ratios.

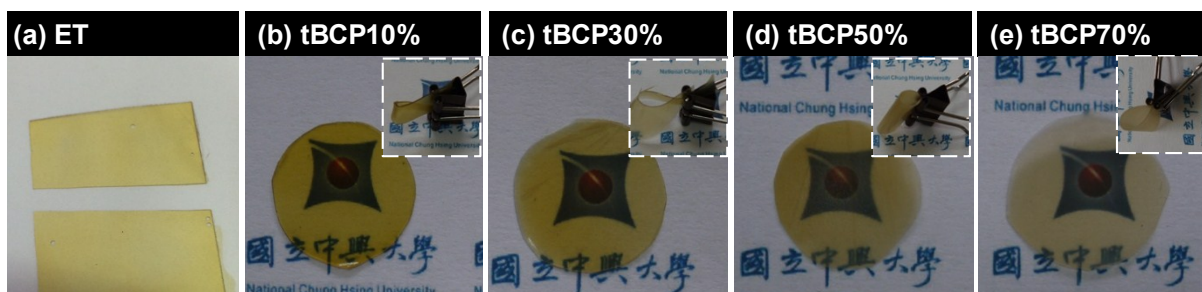

**Figure S4.** Apparent images of ET/tBCP composites at various weight ratios.
